# Supplementary material
Source: publisher site journal article supplement (https://www.dovepress.com/article/343264)
Supplement: Supplementary file 1 [file get_supplementary_file.php]

## **File S1**

### **Definitions**

Sepsis was defined as a documented or suspected infection complicated by at least two of the following criteria: leukocytosis (total white blood cell count  $>12 \times 10^9/L$ ), leucopenia (total white blood cells  $<4 \times 10^9/L$ ), increased C-Reactive protein plasma concentration ( $>15$  mg/L), abnormal body temperature ( $<36$  or  $>38.3^\circ C$ ), tachypnea ( $>20/min$ ) or mechanical ventilation with adjusted respiratory rate, significant edema or a positive fluid balance ( $>20$  mL/kg/24h) and tachycardia ( $>90/min$ ). Severe sepsis was defined as sepsis complicated with organ dysfunction. Organ dysfunction was defined by at least one of the following criteria: respiratory distress ( $PaO_2/FiO_2 <300$ ), oliguria (urinary output  $<0.5$  mL/kg.h for at least 2 hours with adequate fluid treatment (30 ml/kg crystalloid)), increased serum creatinine concentrations ( $>0.5$  mg/dL relative to the baseline or  $>2$  mg/dL), prolonged prothrombin time (INR  $>1.5$ ), thrombocytopenia (platelet count  $<100 \times 10^9/L$ ), hyperbilirubinemia (total bilirubin concentration  $>4$  mg/dL) and elevated serum lactate concentration ( $>1.6$  mmol/L). Septic shock was defined as severe sepsis complicated with hypotension despite adequate fluid resuscitation: systolic blood pressure  $<90$  mmHg, a decrease in systolic blood pressure of  $>40$  mmHg in relative to the baseline, diastolic blood pressure  $<70$  mm Hg or need for vasopressor therapy [11, 12].

## File S2

### NONMEM control stream

\$PROBLEM Meropenem popPK modelling

\$INPUT

ID ; patient identifier  
OCC ; dosing occasion  
TAD ; time after dose, in hours  
TIME ; time, in hours  
EVENT  
DV ; dependent variable, in mg/L  
EVID ; event identifier: 1 is dosing event, 0 is observation event  
MDV ; missing data value  
AMT ; amount of L-AmB administered in mg  
RATE ; infusion rate, in mg/hour  
SEX ; 1=male, 2=Female  
AGE  
BW  
NDOSE  
CG

\$DATA DSCOV.csv IGNORE=@

\$SUBROUTINES ADVAN13 TOL=9

\$MODEL

NCOMPARTMENTS=2  
COMP= (CENTRAL, DEFDOSE)  
COMP=(PERIPH)

\$PK

CLCG = ((CG/111.7) \*\*THETA (5))  
CLCOV=CLCG  
TVCL=THETA (1)  
TVCL = CLCOV\*TVCL  
TVV1=THETA (2)  
TVQ=THETA (3)  
TVV2=THETA (4)  
CL=TVCL\*EXP (ETA (1))  
V1=TVV1\*EXP(ETA(2))  
Q=TVQ  
V2=TVV2\*EXP(ETA(3))  
KE=CL/V1  
K12=Q/V1  
K21=Q/V2  
S1=V1  
S2=V2

\$DES

DADT(1)= -KE\*A(1) +K21\*A(2) -K12\*A(1)  
DADT(2)= -K21\*A(2) +K12\*A(1)

\$ERROR

IPRED=F  
W=SQRT(SIGMA(1,1)\*IPRED\*\*2 + SIGMA(2,2))  
Y=IPRED \* (1+EPS(1))+ EPS(2)  
IRES=DV-IPRED  
IWRES=IRES/W

\$THETA

(0, 13.7) ; CL  
(0,25.5) ; V1  
(0,8.13) ; Q  
(0,12.4) ; V2  
(0,0.637) ; CLCG

\$OMEGA

BLOCK (2)  
0.288 ; IIV on CL  
0.185 0.281 ; IIV on V1

\$OMEGA

0.441 ; IIV on V2

\$SIGMA

0.147 ; prop err  
0.0925 ; add err

\$ESTIMATION METHOD=1 INTERACTION MAXEVAL=9999 NSIG=3 SIGL=9 PRINT=1 POSTHOC NOABORT

\$COVARIANCE PRINT=E

## CONSORT DIAGRAM

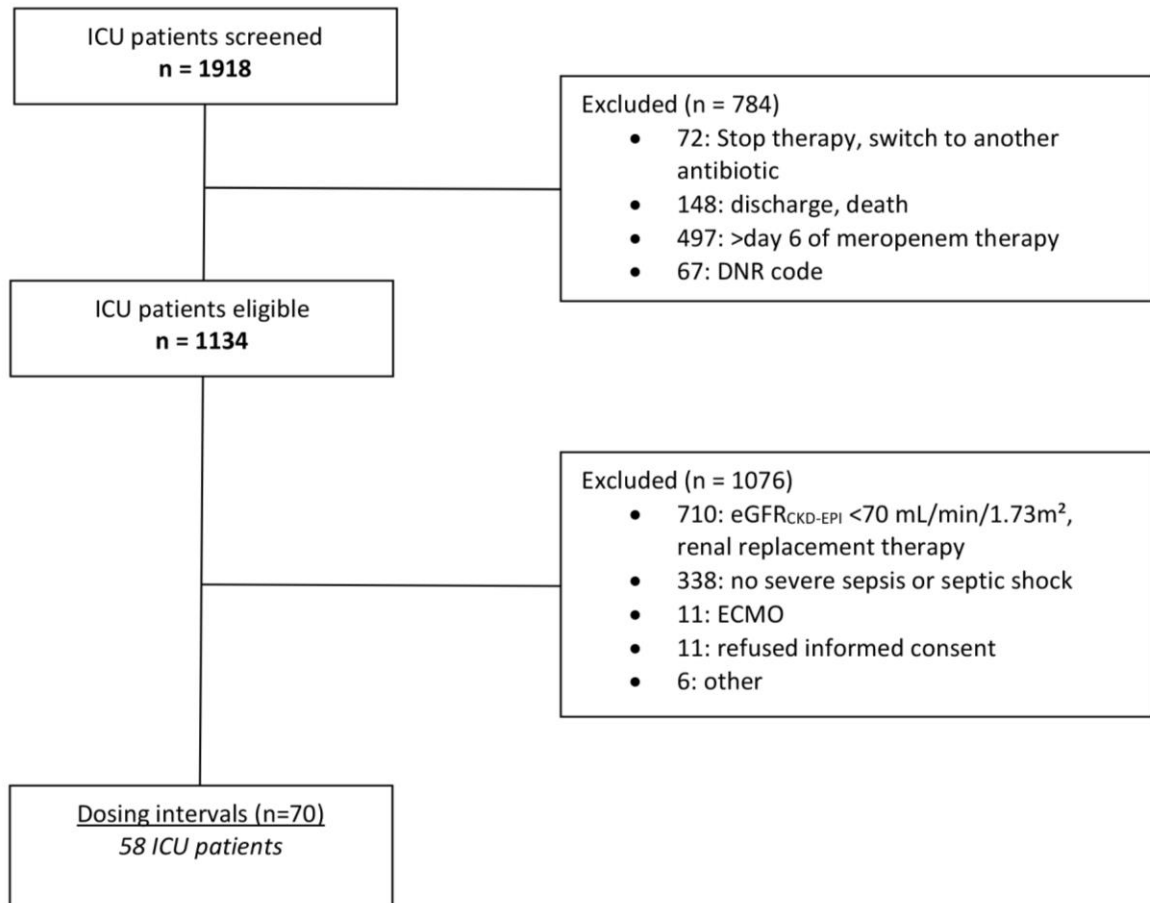

ICU = intensive care unit; DNR = do not resuscitate; ECMO = extracorporeal membrane oxygenation;  $eGFR_{CKD-EPI}$  = estimated glomerular filtration rate according to the Chronic Kidney Disease Epidemiology Collaboration equation

**Supplementary Figure 1.** Study flow diagram.

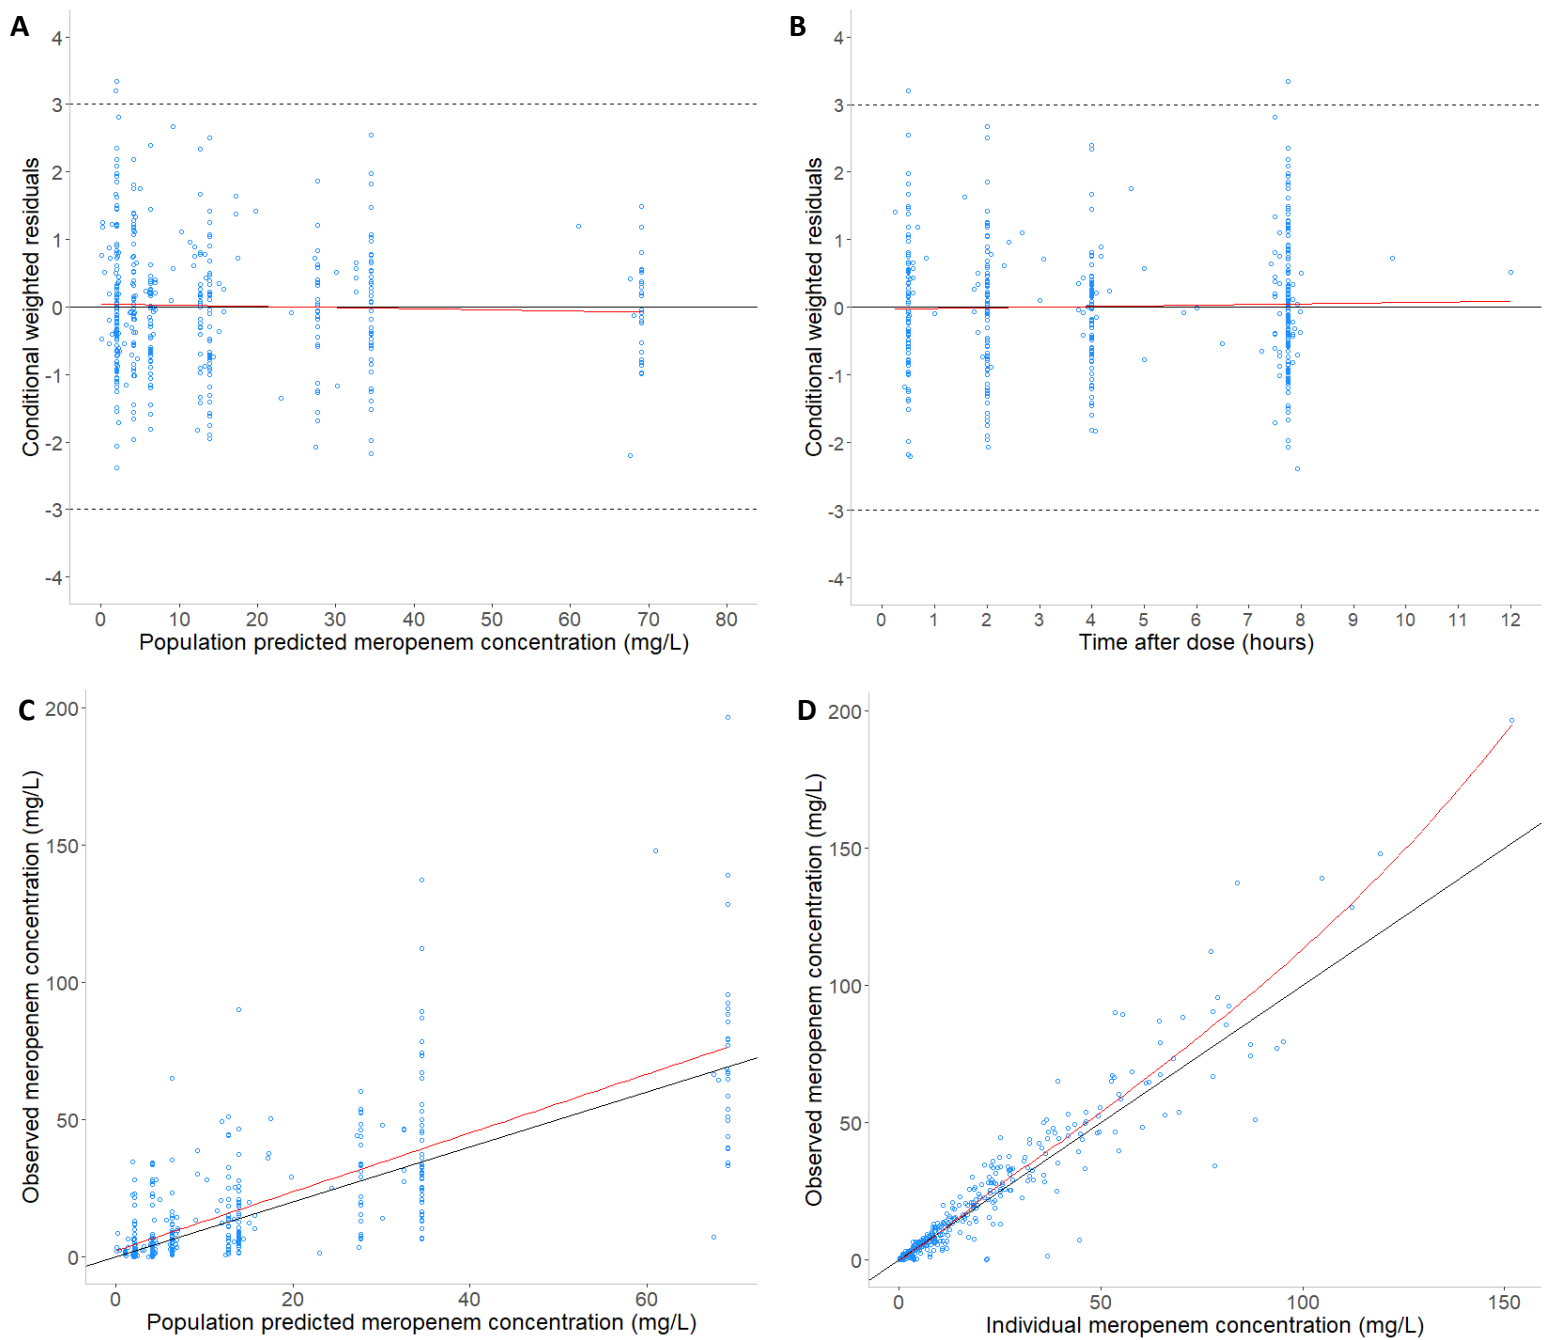

**Supplementary Figure 2.** Base model goodness-of-fit plots. (A) Conditional weighted residuals (CWRES) versus population predicted (PRED); (B) CWRES versus time after dose; (C) observed versus PRED meropenem concentration; (D) observed versus individual predicted meropenem concentration. Solid black lines in panels A -D: line of identity; solid red lines: linear regression lines.

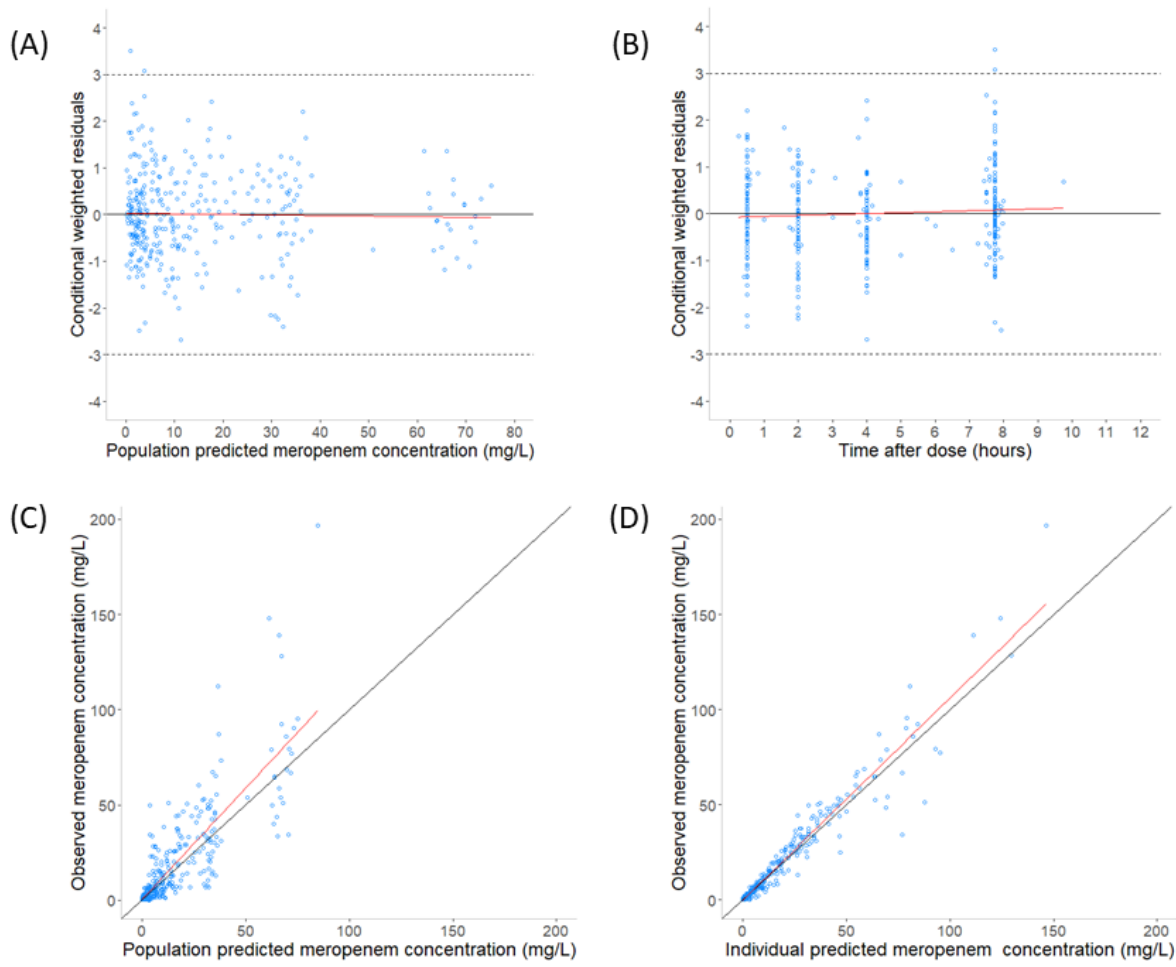

**Supplementary Figure 3.** Final model goodness-of-fit plots. (A) Conditional weighted residuals (CWRES) versus population predicted (PRED); (B) CWRES versus time after dose; (C) observed versus PRED meropenem concentration; (D) observed versus individual predicted meropenem concentration. Solid black lines in panels A -D: line of identity; solid red lines: linear regression lines.
